# Supplementary material
Source: PubMed Central journal article supplement (PMC1276095)

**A**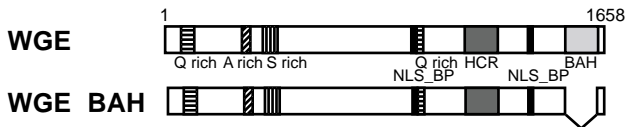**B**

|        |                |      |        |               |          |       |       |
|--------|----------------|------|--------|---------------|----------|-------|-------|
| Dm     | GLFYAGVMKPLRPP | PDV  | YSITL  | DGERGN        | NKSHVMSR | EDIL  | LKDTI |
| Ag     | *****CLSAVQ*   | **I* | AV***  | *****RP*      | I***     | *EV*  | R*A*  |
| Hs (1) | S*L**SVRT*Q*   | **I* | **VIE* | *****RQRIY*L* | QL*      | QEAV  |       |
| Hs (2) |                | TVHS | **I*   | RVVVE*        | *****RP* | IYCL* | QL*   |
| Mm     | S*L**SVRT*Q*   | **I* | **VIE* | *****RQRIY*L* | QL*      | QEAV  |       |

|        |         |         |       |        |         |       |       |        |
|--------|---------|---------|-------|--------|---------|-------|-------|--------|
| Dm     | LEVAPK  | SVESVP  | VGTR  | LCAYWS | QYRCL   | YPGRA | IDSEQ | VVDG   |
| Ag     | *****   | DDIIP   | ***** | *****  | *****   | ***** | ----- | *---   |
| Hs (1) | *D*R*Q* | SRYL*P* | **V*  | *****  | KS***** | ***** | ----- | -N**R* |
| Hs (2) | ID*R*A* | TRFL*Q* | **IA* | *****  | *****   | ***** | ----- | -T**R* |
| Mm     | *D*Q*Q* | SRYL*P* | **V*  | *****  | KS***** | ***** | ----- | -N**R* |

|        |                   |         |       |        |       |       |
|--------|-------------------|---------|-------|--------|-------|-------|
| Dm     | TASSATNAATTAPDFVS | VEFDDGD | SGRIR | LQNIR  | MLLS  | DYPI  |
| Ag     | --AAEPASPDPEKR**N | *****   | N*K*  | A*ED*  | F*M*  | ***** |
| Hs (1) | --*GDEDE---DL*S*V | *****   | T*H*  | AVS*V* | L*PP* | FK*   |
| Hs (2) | ----LLDLEDDG*LIT  | *****   | T*R*  | PLSH*  | L*PP* | *K*   |
| Mm     | ---*DEED---L*S*L  | *****   | T*H*  | AVS**  | L*PP* | FK*   |

**C**

**MERGE**      **FLAG**      **DAPI**

**WGE**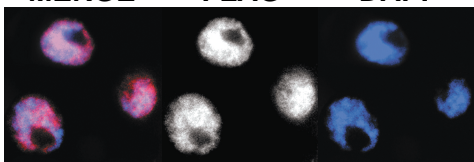**WGE BAH**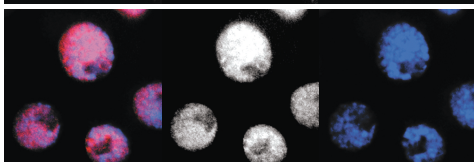

Supplement: pnas_0507945102_1.pdf [file pnas_0507945102_1.pdf]
