# Supplementary material
Source: PubMed Central journal article supplement (PMC1276095)
Supplement: pnas_0507945102_5.pdf [file pnas_0507945102_5.pdf]

**Table 2. The frequencies of eye to wing transformation in various genotypes**

| <b>Genotypes</b>                                        | <b>Eye to wing transformation</b> |          |
|---------------------------------------------------------|-----------------------------------|----------|
|                                                         | <b>%</b>                          | <b>n</b> |
| <i>ey-GAL4 UAS-wge</i>                                  | 28.2                              | 29/103   |
| <i>ey-GAL4 UAS-wge</i> $\Delta$ BAH                     | 0                                 | 0/138    |
| <i>ey-GAL4 UAS-wge UAS-Antp-IR</i>                      | 21.7                              | 10/46    |
| <i>ey-GAL4 UAS-wge UAS-wge-IR</i>                       | 4.2                               | 2/48     |
| <i>ey-GAL4 UAS-wge UAS-lacZ</i>                         | 25.0                              | 8/32     |
| <i>ey-GAL4 UAS-Antp UAS-N<sup>act</sup></i>             | 49.4                              | 77/156   |
| <i>ey-GAL4 UAS-Antp UAS-N<sup>act</sup> UAS-Antp-IR</i> | 0                                 | 0/35     |
| <i>ey-GAL4 UAS-Antp UAS-N<sup>act</sup> UAS-wge-IR</i>  | 1.6                               | 1/61     |
| <i>ey-GAL4 UAS-Antp UAS-N<sup>act</sup> UAS-lacZ</i>    | 44.4                              | 24/54    |

The frequencies of the eye to wing transformation in various genotypes are summarized.

The percentage was calculated as the number of flies with ectopic wings and divided by

the total number of flies multiplied by 100.
