# Supplementary material
Source: PubMed Central journal article supplement (PMC1276095)
Supplement: pnas_0507945102_6.pdf [file pnas_0507945102_6.pdf]

**Table 3. Genetic interaction between *wge* and *Psc* mutation**

| Genotype                                               | Parental generation           |                               | The mean number of sex combs teeth, mean $\pm$ SD | Additional sex combs on tarsal segment 2 of prothoracic leg, |        | Mesothoracic leg with sex combs, |        |
|--------------------------------------------------------|-------------------------------|-------------------------------|---------------------------------------------------|--------------------------------------------------------------|--------|----------------------------------|--------|
|                                                        | Mother                        | Father                        |                                                   | %                                                            | (n)    | %                                | (n)    |
| <i>wge</i> <sup>40/+</sup>                             | Wild type                     | <i>wge</i> <sup>40</sup> /TM3 | 10.6 $\pm$ 0.8 (n = 61)                           | 1.6                                                          | (1/61) | 0                                | (0/62) |
| <i>Psc</i> <sup>1/+</sup>                              | <i>Psc</i> <sup>1</sup> /CyO  | Wild type                     | 11.2 $\pm$ 0.8 (n = 51)                           | 2.0                                                          | (1/51) | 16.0                             | (8/50) |
| <i>Psc</i> <sup>1/+</sup> ; <i>wge</i> <sup>40/+</sup> | <i>Psc</i> <sup>1</sup> /CyO  | <i>wge</i> <sup>40</sup> /TM3 | 10.9 $\pm$ 1.0 (n = 57)                           | 0                                                            | (0/57) | 1.6                              | (1/63) |
| <i>wge</i> <sup>40/+</sup>                             | <i>wge</i> <sup>40</sup> /TM3 | Wild type                     | 11.1 $\pm$ 0.7 (n = 44)                           | 20.4                                                         | (9/44) | 0                                | (0/42) |
| <i>Psc</i> <sup>1/+</sup>                              | Wild type                     | <i>Psc</i> <sup>1</sup> /CyO  | 10.5 $\pm$ 1.0 (n = 37)                           | 0                                                            | (0/37) | 7.5                              | (3/40) |
| <i>Psc</i> <sup>1/+</sup> ; <i>wge</i> <sup>40/+</sup> | <i>wge</i> <sup>40</sup> /TM3 | <i>Psc</i> <sup>1</sup> /CyO  | 11.4 $\pm$ 1.1 (n = 41)                           | 0                                                            | (0/41) | 1.9                              | (1/54) |
| Wild type                                              | Wild type                     | Wild type                     | 9.5 $\pm$ 0.8 (n = 45)                            | 2.2                                                          | (1/45) | 0                                | (0/47) |

*wge*<sup>40</sup>/TM3 flies were crossed with *Psc*<sup>1</sup>/CyO flies and maintained at 25°C. Reciprocal crosses were performed to detect possible maternal effects. For the appearance of extra sex combs in males, offspring with double heterozygous mutations were compared to control siblings mutated in either *wge* or *Psc* locus.
