# Supplementary material
Source: PubMed Central journal article supplement (PMC1276095)

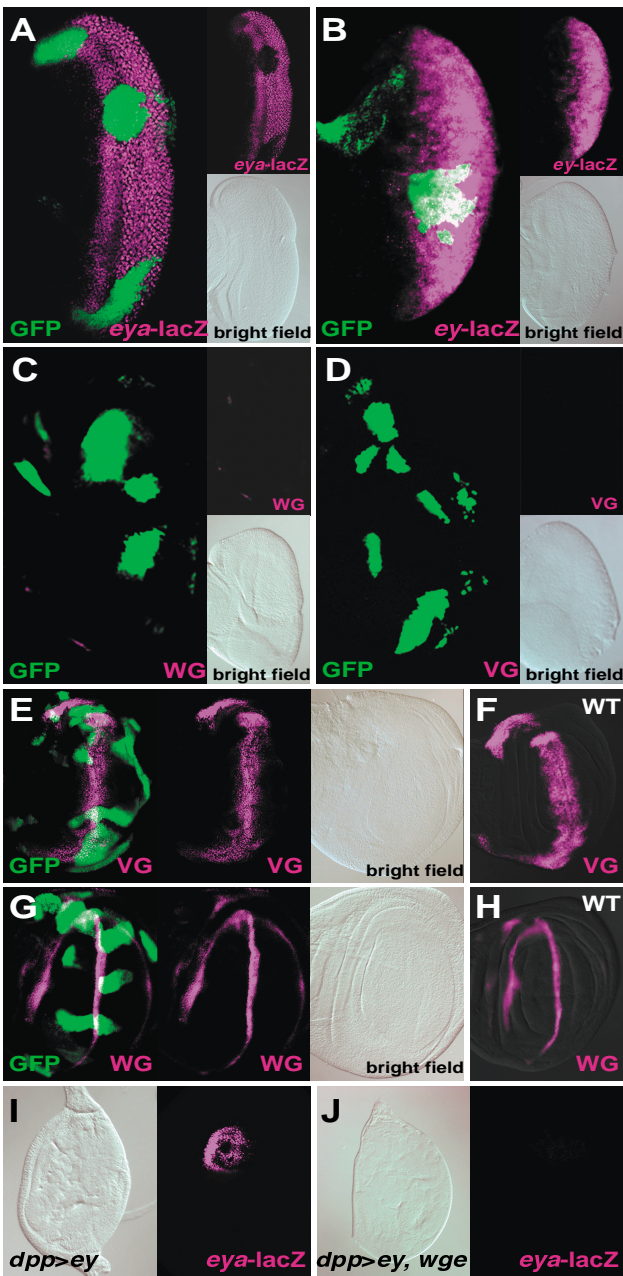

Supplement: pnas_0507945102_2.pdf [file pnas_0507945102_2.pdf]

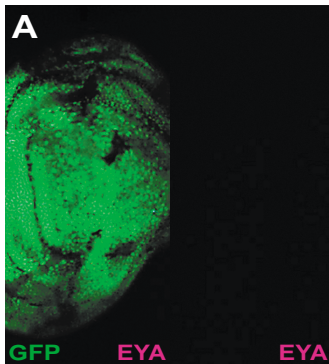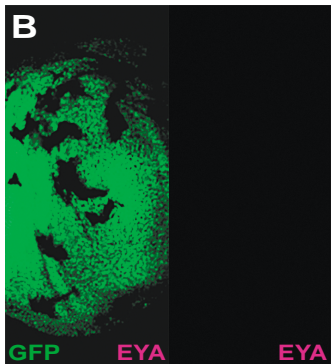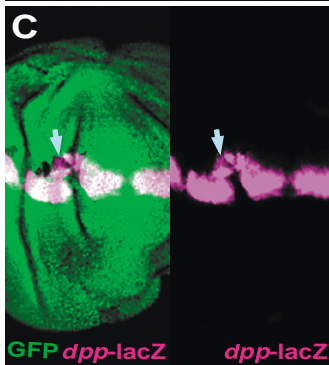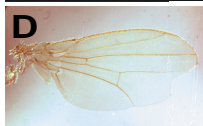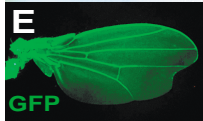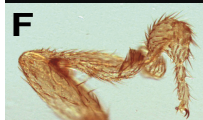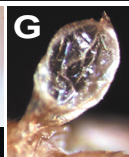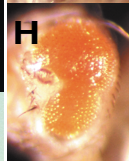

Supplement: pnas_0507945102_3.pdf [file pnas_0507945102_3.pdf]

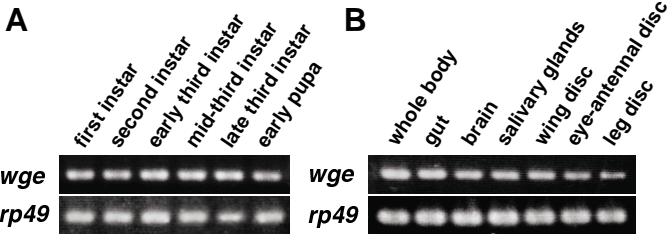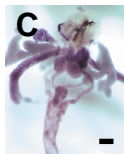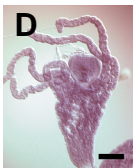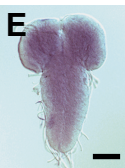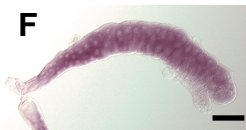

antisense

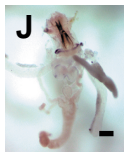

sense

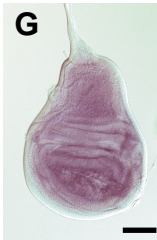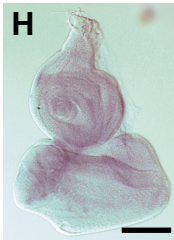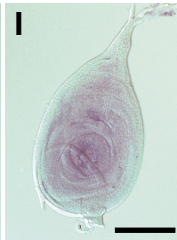

Supplement: pnas_0507945102_4.pdf [file pnas_0507945102_4.pdf]
